# Supplementary material for: Two-dimensional MoS2 modified using CoFe2O4 nanoparticles with enhanced microwave response in the X and Ku band
Source: Royal Society of Chemistry journal article supplement (doi:10.1039/c8qi01304g), 2019-01-01
Supplement: c8qi01304g1.pdf [file c8qi01304g1.pdf]

# **Two-dimensional MoS<sub>2</sub> modified by CoFe<sub>2</sub>O<sub>4</sub> nanoparticles with enhanced microwave response in X and Ku band**

*Xiaoqing Cui, Wei Liu, Weihua Gu, Xiaohui Liang, Guangbin Ji\**

<sup>a</sup> College of Materials Science and Technology, Nanjing University of Aeronautics  
and Astronautics, Nanjing 210016, China

<sup>b</sup> Laboratory of Solid State Microstructures, Nanjing University, Nanjing 210093,  
China

\*Corresponding Author:

Prof. Dr. Guangbin Ji.

Tel: +86-25-52112902; Fax: +86-25-52112626

E-mail: [gbi@nuaa.edu.cn](mailto:gbi@nuaa.edu.cn)

Address: 29# Yudao Street, Nanjing 210016, P.R China

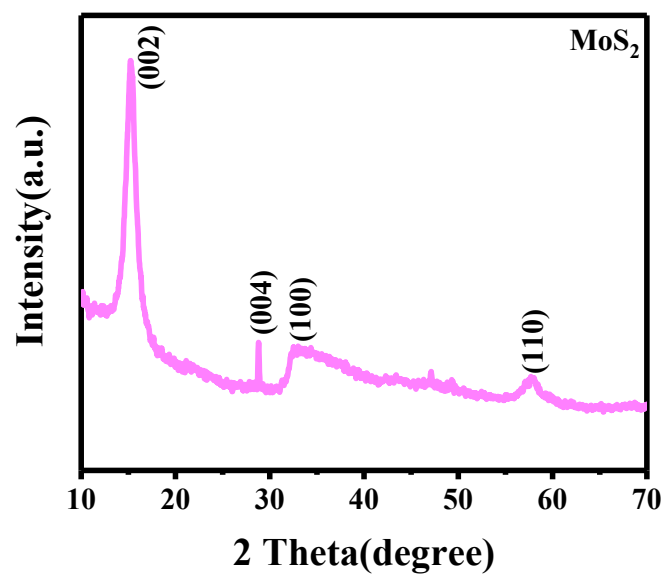

**Figure S1.** XRD pattern of MoS<sub>2</sub>.

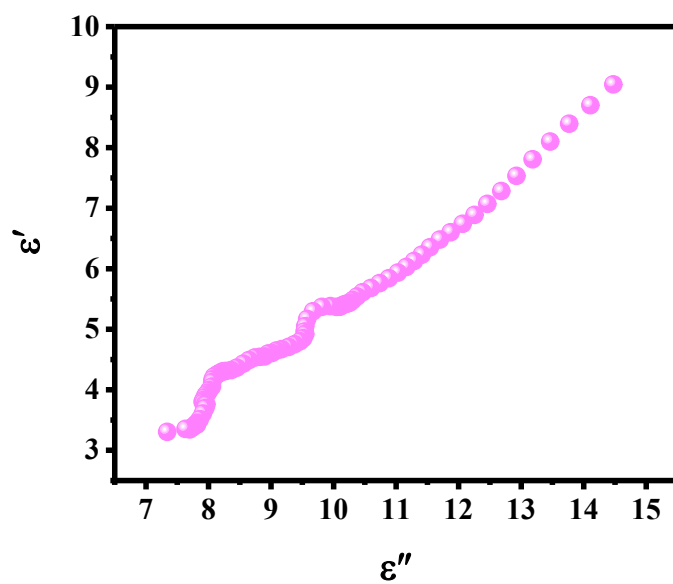

**Figure S2.** The Cole-Cole curve of pure MoS<sub>2</sub>.

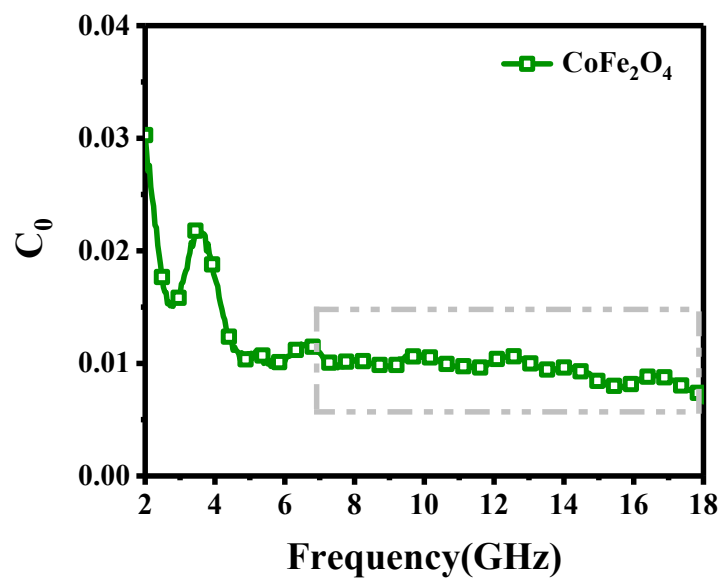

**Figure S3.** The  $C_0$  value of  $\text{CoFe}_2\text{O}_4$ .
